# Supplementary material
Source: Springer Nature journal article supplement (https://www.springermedizin.de/resource/supplementary/12969_2010_805_MOESM2_ESM.pdf/9593046)

**A**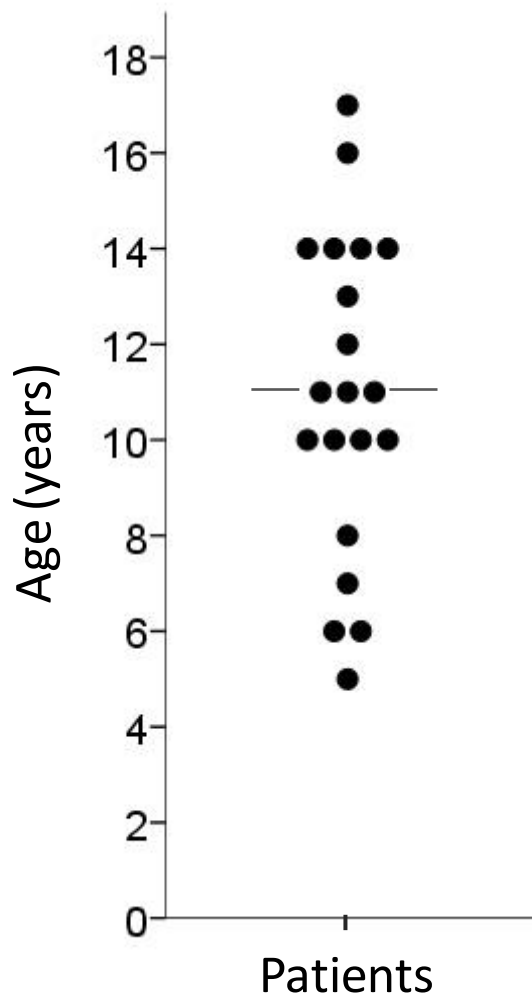**B**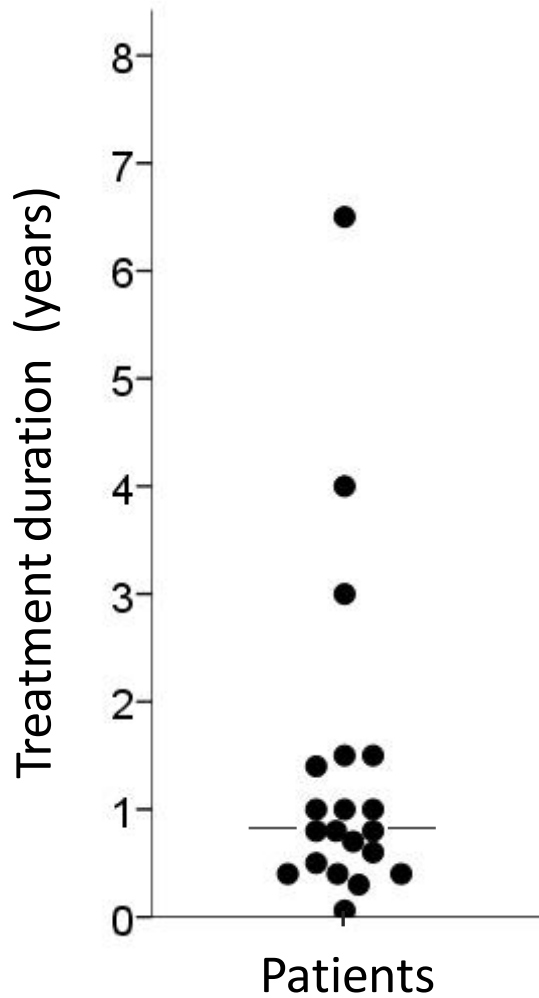

Supplement: MOESM2 [file 9593046]
